# Supplementary material for: Effect of chondroitin sulfate modified polyethyleneimine on mediating oligodeoxynucleotide YW002 in the treatment of periodontitis
Source: Royal Society of Chemistry journal article supplement (doi:10.1039/d4ra00884g), 2024-01-01
Supplement: d4ra00884g1.pdf [file d4ra00884g1.pdf]

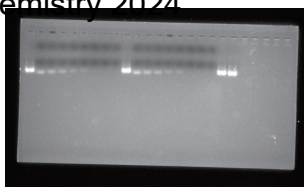

**Fig 2c Agarosegel retardation assays of PEI-CS YW002 nanocomplexes at different ww ratios**

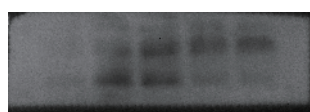

**Fig 4b IL-1β**

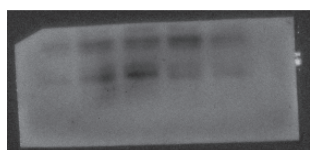

**Fig 4b TNF-α**

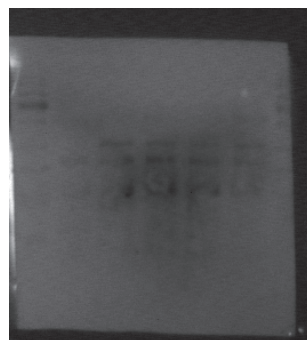

**Fig 4b IL-6**

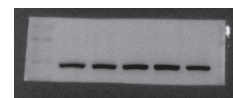

**Fig 4b β-actin**

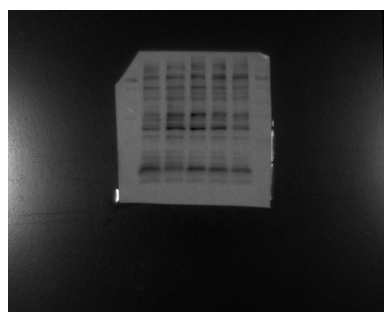

**IL-1β 2**

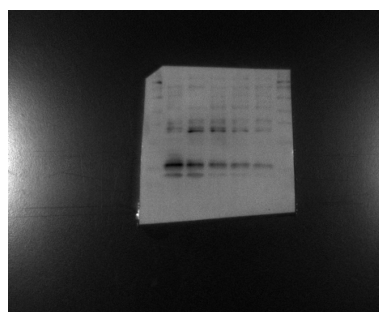

**TNF-α 2**

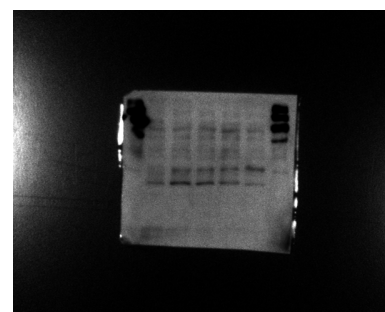

**IL-6 2**

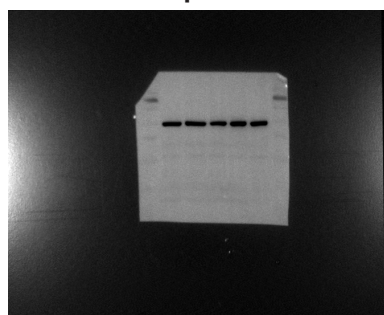

**IL-1β 2 β-actin**

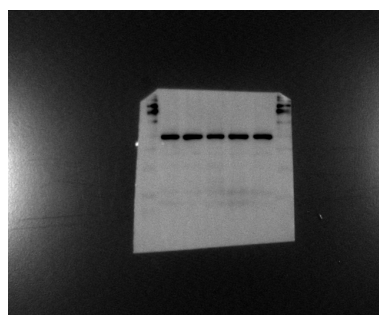

**TNF-α 2 β-actin**

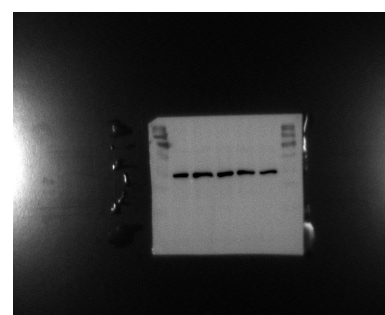

**IL-6 2 β-actin**

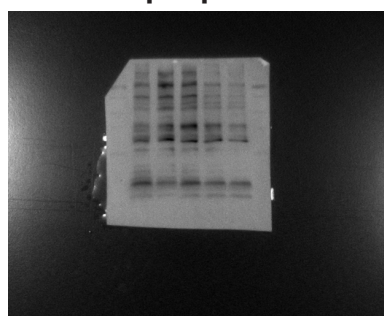

**IL-1β 3**

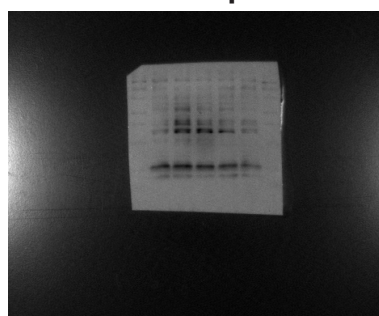

**TNF-α 3**

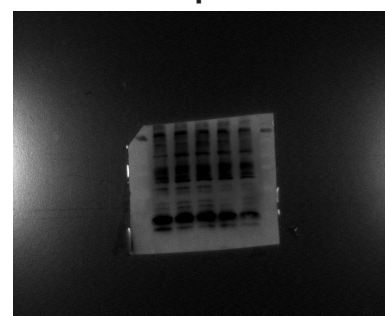

**IL-6 3**

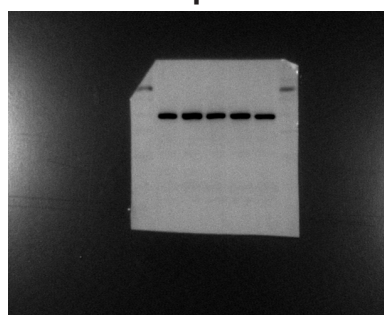

**IL-1β 3 β-actin**

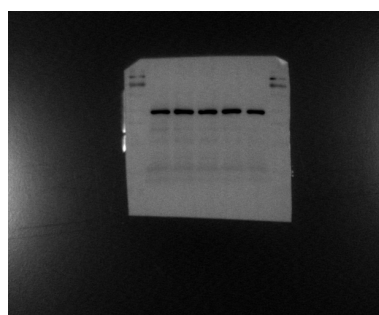

**TNF-α 3 β-actin**

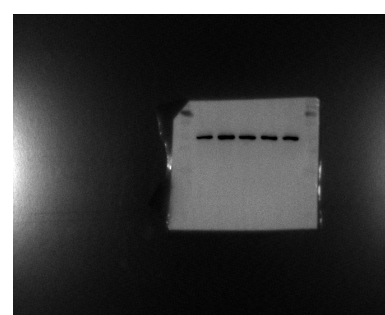

**IL-6 3 β-actin**
